# Supplementary material for: Dehydration and Malnutrition in Residential Care: Recommendations for Strategies for Improving Practice Derived from a Scoping Review of Existing Policies and Guidelines
Source: MDPI journal article supplement (doi:10.3390/geriatrics3040077), 2018-11-12
Supplement: s1 [file s1]

**Supplementary Table 1: UK publicly-available policies, reports and best practice guidelines regarding Nutrition and Hydration care in care homes**

| Funding type | Organisation                                                     | Title                                                | Date | Setting    | Summary                                                                                                                                                                                                                                                                                                                                                                                                                                                                                                                                                                                                   |
|--------------|------------------------------------------------------------------|------------------------------------------------------|------|------------|-----------------------------------------------------------------------------------------------------------------------------------------------------------------------------------------------------------------------------------------------------------------------------------------------------------------------------------------------------------------------------------------------------------------------------------------------------------------------------------------------------------------------------------------------------------------------------------------------------------|
| Charity      | Age UK (West Cumbria)                                            | Target: Well-being Nutrition Scoping                 | 2009 | care homes | Nutrition Scoping exercise in Northwest Cumbria Community Research Service to find the most recent and relevant documents concerning nutrition-related practice for older people in care homes.                                                                                                                                                                                                                                                                                                                                                                                                           |
| Charity      | Age UK                                                           | My Home Life, Issue 18                               | 2016 | care homes | Mealtimes are a big part of everyone's day and food is a subject everyone loves to talk about. Eating and drinking well is an important part of keeping healthy and happy. The way food is offered, how and where it is served and the choices that are given make a real difference. Sometimes the smallest things have the biggest impact. This bulletin captured lots of ideas from care homes around the UK to share.<br>Website: <a href="http://www.ageuk.org.uk">www.ageuk.org.uk</a> .                                                                                                            |
| Charity      | BAPEN (British association for parenteral and enteral nutrition) | Nutrition Screening Surveys in Care Homes in England | 2015 | care homes | Summarises findings of 4 surveys of UK hospitals, care homes and mental health units between 2007 and 2011. The surveys aimed to establish the prevalence of 'malnutrition' in the different care settings, to document current screening practice and identify problems that needed addressing and to provide feedback to local centres. This report is based on the amalgamated data from the UK care homes that participated in the four surveys, providing new information on the trends in nutritional care over time.<br>Website: <a href="https://www.bapen.org.uk">https://www.bapen.org.uk</a> . |

| Funding type   | Organisation                                                      | Title                                                                                                                                                                            | Date | Setting                       | Summary                                                                                                                                                                                                                                                                                                                                                                                                                                                                                                           |
|----------------|-------------------------------------------------------------------|----------------------------------------------------------------------------------------------------------------------------------------------------------------------------------|------|-------------------------------|-------------------------------------------------------------------------------------------------------------------------------------------------------------------------------------------------------------------------------------------------------------------------------------------------------------------------------------------------------------------------------------------------------------------------------------------------------------------------------------------------------------------|
| Academic       | Bournemouth University on behalf of the Burdett Trust for Nursing | Empowering Nurses and Care Home Staff to Lead Excellence in Nutrition and Dignity In Dementia Care Through Evidence Based Learning to Enhance the Care Environment. Final report | 2016 | care homes: dementia-specific | The overall aim of the project was to identify best practice for delivering nutrition in dementia care by providing a new nutrition education programme based on fundamental principles of self-leadership and nutrition to empower nurses and care home staff.<br>Website: <a href="https://research.bournemouth.ac.uk/2017/05/eating-and-drinking-well-supporting-people-living-with-dementia/">https://research.bournemouth.ac.uk/2017/05/eating-and-drinking-well-supporting-people-living-with-dementia/</a> |
| UK Public body | Care Quality Commission (CQC)                                     | Time to listen In care homes Dignity and nutrition inspection programme                                                                                                          | 2012 | care homes                    | Looked at dignity and nutrition issues for older people living in 500 care homes across England, covering both homes that provide nursing care and those that do not.<br>Website: <a href="http://www.cqc.org.uk/sites/default/files/documents/time_to_listen_-_care_homes_main_report_tag.pdf">http://www.cqc.org.uk/sites/default/files/documents/time_to_listen_-_care_homes_main_report_tag.pdf</a>                                                                                                           |
| UK Public body | CQC                                                               | Health and social care act Regulation 14: Meeting nutritional and hydration needs                                                                                                |      | care homes                    | CQC regulation ensuring that people who use services have adequate nutrition and hydration to sustain life and good health and reduce the risks of malnutrition and dehydration while they receive care and treatment.<br>Website: <a href="https://www.cqc.org.uk/">https://www.cqc.org.uk/</a> .                                                                                                                                                                                                                |
| UK public body | CQC                                                               | The State of Adult Social Care Services                                                                                                                                          | 2017 | care homes                    | Reports on what the CQC found about the quality of care across the whole range of adult social care services that they regulate.<br>Website: <a href="https://www.cqc.org.uk/">https://www.cqc.org.uk/</a> .                                                                                                                                                                                                                                                                                                      |

| Funding type   | Organisation                | Title                                                                                           | Date | Setting    | Summary                                                                                                                                                                                                                                                                                                                                                                                                                                                                                                                                                                                                                                                                                                                                                               |
|----------------|-----------------------------|-------------------------------------------------------------------------------------------------|------|------------|-----------------------------------------------------------------------------------------------------------------------------------------------------------------------------------------------------------------------------------------------------------------------------------------------------------------------------------------------------------------------------------------------------------------------------------------------------------------------------------------------------------------------------------------------------------------------------------------------------------------------------------------------------------------------------------------------------------------------------------------------------------------------|
| Public body    | Council of Europe           | Nutrition in care homes and home care - From recommendations to action (2009)                   | 2009 | care homes | Reporting on the prevalence, causes and specific consequences of undernutrition in care homes and home care.<br>Website: <a href="http://book.coe.int">http://book.coe.int</a>                                                                                                                                                                                                                                                                                                                                                                                                                                                                                                                                                                                        |
| UK public body | Derbyshire County Council   | Care homes: a literature Review                                                                 | 2013 | care homes | This literature review aimed to expand on the findings of the previous literature review, with the following objectives: to report the prevalence of diseases amongst care home residents, and identify any conditions where prevalence is higher amongst care home residents compared to the elderly population residing in the community compare the rates of hospital admissions amongst care home residents with the elderly population living in the community, and identify the main diagnoses that result in admissions for care home residents identify interventions that are effective at reducing hospital admissions among care home residents.<br>Website: <a href="https://observatory.derbyshire.gov.uk/">https://observatory.derbyshire.gov.uk/</a> . |
| UK Public body | Department of Health (DOH)  | Care Homes for Older People: National Minimum Standards Care Homes Regulations 3rd Edition 2000 | 2003 | care homes | A statement of national minimum standards of care homes covering all aspects of care. Published by the Secretary of State for Health under section 23(1) of the Care Standards Act 2000. Meals & nutrition covered on p.13-16.<br>Website: <a href="http://www.dignityincare.org.uk/_library/resources/dignity/csipcomment/csci_national_minimum_standards.pdf">http://www.dignityincare.org.uk/_library/resources/dignity/csipcomment/csci_national_minimum_standards.pdf</a>                                                                                                                                                                                                                                                                                        |
| UK Public body | Food standards agency (FSA) | Example menus for care homes                                                                    | 2007 | care homes | To develop a one-week example menu plan, menu 1, with recipes and full nutrient analysis for older people, over 75 years, in care homes, to assist care caterers in menu planning.<br>A further one-week menu cycle, menu 2, is also included.<br>Website: <a href="http://www.food.gov.uk/sites/default/files/multimedia/pdfs/carehomemenus.pdf">http://www.food.gov.uk/sites/default/files/multimedia/pdfs/carehomemenus.pdf</a>                                                                                                                                                                                                                                                                                                                                    |
| UK Public body | Food standards agency       | Guidance on food served to older people in residential care                                     | 2007 | care homes | This document provides specific guidance to care homes for older people who do not have nutritional requirements due to illness or disease.<br>Website: <a href="http://www.food.gov.uk/sites/default/files/multimedia/pdfs/olderresident.pdf">http://www.food.gov.uk/sites/default/files/multimedia/pdfs/olderresident.pdf</a>                                                                                                                                                                                                                                                                                                                                                                                                                                       |

| Funding type   | Organisation                                     | Title                                                                                                                      | Date | Setting                  | Summary                                                                                                                                                                                                                                                                                                                                                                                                                                                                                                                                                                                                                                                                                                                                                           |
|----------------|--------------------------------------------------|----------------------------------------------------------------------------------------------------------------------------|------|--------------------------|-------------------------------------------------------------------------------------------------------------------------------------------------------------------------------------------------------------------------------------------------------------------------------------------------------------------------------------------------------------------------------------------------------------------------------------------------------------------------------------------------------------------------------------------------------------------------------------------------------------------------------------------------------------------------------------------------------------------------------------------------------------------|
| UK Public body | Malnutrition Task Force (DOH-funded)             | Malnutrition in Later Life: Prevention and Early Intervention Best Practice Principles & Implementation Guide (Care Homes) | 2013 | Care homes               | This guide defines the principles of best practice, the moral, legal, quality and financial case for change and practical advice to support a wide range of health, social care and voluntary organisations in making the required changes to counter malnutrition.<br>Website: <a href="http://www.malnutritiontaskforce.org.uk/wp-content/uploads/2014/07/Prevention_Early_Intervention_Of_Malnutrition_in_Later_Life_Care_Home.pdf">http://www.malnutritiontaskforce.org.uk/wp-content/uploads/2014/07/Prevention_Early_Intervention_Of_Malnutrition_in_Later_Life_Care_Home.pdf</a>                                                                                                                                                                           |
| UK Public body | National Institute of Clinical Excellence (NICE) | Older people in care homes.                                                                                                | 2015 | care homes               | This briefing summarises NICE's key recommendations for local authorities and partner organisations on the health and care of older people in care homes. It also highlights relevant quality standards. One paragraph on malnutrition - saying it needs to be addressed.<br>Website: <a href="http://www.nice.org.uk/advice/lgb25/resources/older-people-in-care-homes-60521208572869">http://www.nice.org.uk/advice/lgb25/resources/older-people-in-care-homes-60521208572869</a>                                                                                                                                                                                                                                                                               |
| UK public body | NICE                                             | Oral health in care homes. Quality standard.                                                                               | 2017 | older people, care homes | Adults who move into a care home have their mouth care needs assessed on admission.<br>Website: <a href="http://nice.org.uk/guidance/qs151">nice.org.uk/guidance/qs151</a>                                                                                                                                                                                                                                                                                                                                                                                                                                                                                                                                                                                        |
| UK Public body | Northern Ireland (NI), Public Health Agency      | Nutritional guidelines and menu checklist                                                                                  | 2014 | care homes               | Aims of the guidelines: <ul style="list-style-type: none"> <li>• To encourage and support the provision of a balanced diet to individuals in residential and nursing homes in Northern Ireland.</li> <li>• To provide additional information on older adults' dietary needs and related nutrition disorders.</li> <li>• To highlight the importance of identifying and addressing malnutrition.</li> <li>• To provide practical guidance and tools for menu planning and modifying food and drinks.</li> </ul> Website: <a href="http://www.publichealth.hscni.net/sites/default/files/Nutritional_guidlines_and_menu_checklist_march_2014.pdf">http://www.publichealth.hscni.net/sites/default/files/Nutritional_guidlines_and_menu_checklist_march_2014.pdf</a> |

| Funding type   | Organisation                                                   | Title                                                                                                                          | Date | Setting    | Summary                                                                                                                                                                                                                                                                                                                                                                                                                                                                                                                                                                                                                                                                                                                                                                                                                                                                                                                                                                                                                                                                                                                                                |
|----------------|----------------------------------------------------------------|--------------------------------------------------------------------------------------------------------------------------------|------|------------|--------------------------------------------------------------------------------------------------------------------------------------------------------------------------------------------------------------------------------------------------------------------------------------------------------------------------------------------------------------------------------------------------------------------------------------------------------------------------------------------------------------------------------------------------------------------------------------------------------------------------------------------------------------------------------------------------------------------------------------------------------------------------------------------------------------------------------------------------------------------------------------------------------------------------------------------------------------------------------------------------------------------------------------------------------------------------------------------------------------------------------------------------------|
| UK Public body | NI Government (The Regulation & Quality Improvement Authority) | Promoting Good Nutrition<br>A Strategy for good nutritional care for adults in all care settings in Northern Ireland 2011-2016 | 2011 | care homes | A Strategy for Good Nutritional Care for Adults in all Care Settings in Northern Ireland, the 10 Key Characteristics of the Council of Europe Resolution on Food and Nutritional Care in Health and Social Care Settings sets the scene for the development of a framework for action, by describing what good nutritional care looks like for each characteristic.<br>Website; <a href="https://www.health-ni.gov.uk/sites/default/files/publications/dhssps/promoting-good-nutrition_0.pdf">https://www.health-ni.gov.uk/sites/default/files/publications/dhssps/promoting-good-nutrition_0.pdf</a>                                                                                                                                                                                                                                                                                                                                                                                                                                                                                                                                                  |
| UK Public body | Public Health England                                          | Healthier and More Sustainable Catering<br>A toolkit for serving food to older people in residential care                      | 2014 | care homes | This toolkit contains practical information and useful tips to help those working within residential care settings to buy, cook and serve healthier, more sustainable food.<br>Sections:<br>4.2 This toolkit also provides examples of analysed menus that meet the target recommendations described in Healthier and More Sustainable Catering: Nutrition Principles.<br>4.3 Information on food hygiene, cultural/religious needs, allergy and calorie labelling is also covered.<br>4.4 Practical information included in this toolkit refers to Government Buying Standards for Food and Catering Services (GBSF, see Appendix 1). GBSF ensures that:<br>- foods procured are served to higher nutritional standards<br>- foods are produced to higher sustainability standards and<br>- procurement of catering operations meets higher sustainability standards eg through reducing food waste.<br>Website:<br><a href="https://www.gov.uk/government/uploads/system/uploads/attachment_data/file/347890/Older_people_toolkit.pdf">https://www.gov.uk/government/uploads/system/uploads/attachment_data/file/347890/Older_people_toolkit.pdf</a> |

| Funding type   | Organisation                                  | Title                                                                                                   | Date | Setting    | Summary                                                                                                                                                                                                                                                                                                                                                                                                                                                                                                                                                                                                                                                                                                                                                                                                                                                                                                                                                                                                                                                                                                                                                |
|----------------|-----------------------------------------------|---------------------------------------------------------------------------------------------------------|------|------------|--------------------------------------------------------------------------------------------------------------------------------------------------------------------------------------------------------------------------------------------------------------------------------------------------------------------------------------------------------------------------------------------------------------------------------------------------------------------------------------------------------------------------------------------------------------------------------------------------------------------------------------------------------------------------------------------------------------------------------------------------------------------------------------------------------------------------------------------------------------------------------------------------------------------------------------------------------------------------------------------------------------------------------------------------------------------------------------------------------------------------------------------------------|
| UK public body | Public Health England                         | Healthier and More Sustainable Catering: A toolkit for serving food to older people in residential care | 2017 | care homes | <p>This toolkit contains practical information and useful tips to help those working within residential care settings to buy, cook and serve healthier, more sustainable food.</p> <p>Sections:</p> <p>4.2 Information on food hygiene, cultural/religious needs, allergy and calorie labelling is also covered.</p> <p>4.3 Practical information included in this toolkit refers to Government Buying Standards for Food and Catering Services (see Appendix 1). GBSF ensures that:</p> <ul style="list-style-type: none"> <li>• foods procured are served to higher nutritional standards</li> <li>• foods are produced to higher sustainability standards and</li> <li>• procurement of catering operations meets higher sustainability standards eg through reducing food waste</li> </ul> <p>4.4 The Food Standards Agency provides advice on good food hygiene in Appendix 3, including how to handle foods that need extra care, cleaning, cooking and food storage; advice on allergens is also available at Appendix 4.</p> <p>Website: <a href="https://assets.publishing.service.gov.uk/">https://assets.publishing.service.gov.uk/</a></p> |
| UK Public body | Scotland, The Care Commission                 | Promoting nutrition in care homes for older people                                                      | 2009 | care homes | This report evaluates a programme aimed at improving nutrition in Scotland's care homes for older people.                                                                                                                                                                                                                                                                                                                                                                                                                                                                                                                                                                                                                                                                                                                                                                                                                                                                                                                                                                                                                                              |
| UK Public body | Scotland, The Care Commission                 | Eating well in care homes for older people                                                              | 2009 | care homes | <p>Information about the policies and procedures which care services should have in place. Recommendations provided about what all care homes should do.</p> <p>Website: <a href="http://www.holyroodpr.co.uk/images/uploads/documents/18SEPeatingwell.pdf">http://www.holyroodpr.co.uk/images/uploads/documents/18SEPeatingwell.pdf</a></p>                                                                                                                                                                                                                                                                                                                                                                                                                                                                                                                                                                                                                                                                                                                                                                                                           |
| UK Public body | Scotland, Centre for Health & Social Research | The Nutrition of elderly people and nutritional aspects of their care in long-term settings             | 2000 | care homes | <p>Audit report. A national audit to identify nutritional problems and improve nutrition in older care home residents.</p> <p>Website: <a href="http://admin.1fife.org.uk/weborgs/nhs/uploadfiles/publications/c64_CHSR_Nutrition_Residential_Care_Older_People.pdf">http://admin.1fife.org.uk/weborgs/nhs/uploadfiles/publications/c64_CHSR_Nutrition_Residential_Care_Older_People.pdf</a></p>                                                                                                                                                                                                                                                                                                                                                                                                                                                                                                                                                                                                                                                                                                                                                       |

| Funding type   | Organisation                                               | Title                                                    | Date    | Setting    | Summary                                                                                                                                                                                                                                                                                                                                                                                                                                                                                                        |
|----------------|------------------------------------------------------------|----------------------------------------------------------|---------|------------|----------------------------------------------------------------------------------------------------------------------------------------------------------------------------------------------------------------------------------------------------------------------------------------------------------------------------------------------------------------------------------------------------------------------------------------------------------------------------------------------------------------|
| UK Public body | Social Care and Social Work Improvement Scotland (SCSWIS). | National care standards for care homes for older people  | 2007    | care homes | Re care standards in general. Nutrition mentioned, but no detail provided.<br>Website: <a href="http://www.gov.scot/Resource/Doc/349525/0116836.pdf">http://www.gov.scot/Resource/Doc/349525/0116836.pdf</a>                                                                                                                                                                                                                                                                                                   |
| UK Public body | Social Care Institute for Excellence (SCIE)                | Nutritional care and hydration                           | 2009    | care homes | This Dignity in Care guide aims to: <ul style="list-style-type: none"> <li>• examine why the problem of malnutrition in older people persists, despite a raft of policy and guidance</li> <li>• offer some solutions to the various problems that prevent change from happening</li> <li>• highlight the key messages from guidance on nutrition (see Practice points)</li> <li>• ensure that guidance is accessible to the social care sector by providing links to key documents (see Resources).</li> </ul> |
| UK Public body | SCIE                                                       | Nutritional care and older people                        | 2009    | care homes | This 'At a Glance' summary examines nutritional care in relation to older people. As part of its Nutrition Action Plan, the Department of Health has asked SCIE to provide guidance on nutrition for the social care sector. SCIE's Dignity in Care guide has been expanded to cover this information in a section on Nutritional care.<br>Website: <a href="http://www.scie.org.uk/publications/ataglance/ataglance03.pdf">http://www.scie.org.uk/publications/ataglance/ataglance03.pdf</a>                  |
| UK Public body | SCIE                                                       | Commissioning care homes: common safeguarding challenges | 2012    | care homes | Nutrition is a section and it refers to the 'at a glance' document above ( <a href="http://www.scie.org.uk/publications/ataglance/ataglance03.pdf">http://www.scie.org.uk/publications/ataglance/ataglance03.pdf</a> ).                                                                                                                                                                                                                                                                                        |
| UK Public body | Social Care Institute for excellence (SCIE)                | Dignity in care: Eating & nutritional care               | current | care homes | This is from the SCIE website ( <a href="https://www.scie.org.uk/">https://www.scie.org.uk/</a> ) which covers a number of care issues relating to dignity (eg abuse, personal care).<br>Website covers screening, and practical tips to aid eating and drinking, rather than nutritional content of food.                                                                                                                                                                                                     |

| Funding type   | Organisation                                  | Title                     | Date | Setting    | Summary                                                                                                                                                                                                                                        |
|----------------|-----------------------------------------------|---------------------------|------|------------|------------------------------------------------------------------------------------------------------------------------------------------------------------------------------------------------------------------------------------------------|
| UK Public Body | Wessex Academic Health Science Network (AHSN) | The Nourish Resource Pack | 2017 | care homes | Resource to promote nutrition and hydration in care homes.<br>Website: <a href="http://wessexahsn.org.uk/img/projects/Nourish%20Resource%20Pack%20Poster.pdf">http://wessexahsn.org.uk/img/projects/Nourish%20Resource%20Pack%20Poster.pdf</a> |
